# Supplementary material for: Membrane potential drives the exit from pluripotency and cell fate commitment via calcium and mTOR
Source: PubMed Central journal article supplement (PMC9637099; doi:10.1038/s41467-022-34363-w), 2022-11-05
Supplement: 41467_2022_34363_MOESM3_ESM.pdf [file 41467_2022_34363_MOESM3_ESM.pdf]

## **Description of Additional Supplementary Files**

File Name: Supplementary Data 1

Description: Gene set enrichments for differentially expressed genes activated and repressed clusters.

File Name: Supplementary Movie 1

Description: Time lapse recording of GCaMP6 fluorescence in the animal pole of control MO stage 10 embryo. Duration= 20s (1 frame per second).

File Name: Supplementary Movie 2

Description: Time lapse recording of GCaMP6 fluorescence in the animal pole of kcnh6 MO stage 10 embryo. Duration= 20s (1 frame per second).
